# Supplementary material
Source: MDPI journal article supplement (https://www.mdpi.com/2624-5647/5/1/2)
Supplement: s1 [file s1]

Table S1. The frequency of patients who received vaccine

|                     | Total | Vaccine     |
|---------------------|-------|-------------|
| HCC (-)             | 339   | 327 (96.5%) |
| HCC (+)             | 92    | 89 (96.7%)  |
|                     |       |             |
| Liver cirrhosis (-) | 277   | 267 (96.4%) |
| Liver cirrhosis (+) | 154   | 149 (96.7%) |
|                     |       |             |
| AID (-)             | 323   | 314 (97.2%) |
| AID (+)             | 108   | 102 (94.2%) |
|                     |       |             |
| HBV                 | 80    | 78 (97.5%)  |
| HCV                 | 84    | 82 (97.6%)  |
| AIH                 | 42    | 40 (95.2%)  |
| PBC                 | 36    | 33 (91.7%)  |
| NAFLD               | 87    | 94 (96.9%)  |
| Alcohol             | 48    | 47 (97.9%)  |
| Others              | 30    | 29 (96.7%)  |
| unknown             | 14    | 13 (92.9%)  |

HCC; Hepatocellular carcinoma, AID; Autoimmune disease, HBV; Hepatitis B virus, HCV; Hepatitis C virus, AIH; Autoimmune hepatitis, PBC; Primary biliary cirrhosis, NAFLD; Non-alcoholic fatty liver disease
